# Supplementary material
Source: publisher figshare collection journal article supplement (https://acs.figshare.com/ndownloader/files/5898882)

**Terms & Conditions**

Electronic Supporting Information files are available without a subscription to ACS Web Editions. The American Chemical Society holds a copyright ownership interest in any copyrightable Supporting Information. Files available from the ACS website may be downloaded for personal use only. Users are not otherwise permitted to reproduce, republish, redistribute, or sell any Supporting Information from the ACS website, either in whole or in part, in either machine-readable form or any other form without permission from the American Chemical Society. For permission to reproduce, republish and redistribute this material, requesters must process their own requests via the RightsLink permission system. Information about how to use the RightsLink permission system can be found at <http://pubs.acs.org/page/copyright/permissions.html>

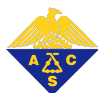

**ACS Publications**

MOST TRUSTED. MOST CITED. MOST READ.

Copyright © 1998 American Chemical Society

## Structural Characterization of a 4-Hydroxy-2-alkenal-derived Fluorophore that Contributes to Lipoperoxidation-dependent Protein Crosslinking in Aging and Degenerative Disease

Guozhang Xu and Lawrence M. Sayre\*

### Supplementary Material

**Preparation of (*E*)-4-oxo-2-nonenal (4).** A solution of HNE dimethyl acetal (35) (0.5 g, 2.45 mmol) in 20 mL dry CH<sub>2</sub>Cl<sub>2</sub> was added dropwise to a well-stirred solution of pyridinium chlorochromate (1.06 g, 4.90 mmol) in dry CH<sub>2</sub>Cl<sub>2</sub> containing 1.5 g NaOAc. After 6 h the solution was concentrated, and the dark residue was diluted with 250 mL of dry ether and filtered through cotton gauze. Upon evaporation of solvent, the residue was purified by flash chromatography (EtOAc as eluent) to yield 460 mg (96%) of (*E*)-1,1-dimethoxy-2-nonen-4-one: <sup>1</sup>H NMR (CDCl<sub>3</sub>) δ 0.85 (t, J = 6.81 Hz, 3H), 1.20-1.32 (m, 4H), 1.53-1.63 (m, 2H), 2.53 (t, J = 7.41 Hz, 2H), 3.31 (s, 6H), 4.90 (dd, J = 3.84 and 1.08 Hz, 1H), 6.33 (dd, J = 16.89 and 1.08 Hz, 1H), 6.55 (dd, J = 16.09 and 3.96 Hz, 1H); <sup>13</sup>C NMR (CDCl<sub>3</sub>) δ 13.94 (-), 22.48 (+), 23.72 (+), 31.43 (+), 40.68 (+), 52.98 (-), 101.08 (-), 132.12 (-), 139.91 (-), 200.47 (+); HRMS calcd for C<sub>11</sub>H<sub>20</sub>O<sub>3</sub> *m/z* 200.1413, found 200.1412. The latter compound (460 mg, 2.3 mol) was added to 30 mL of 2N HCl/acetone (1:2 v/v), and after stirring for 4 h, the reaction mixture was concentrated and extracted with CH<sub>2</sub>Cl<sub>2</sub>. The combined organic layer was dried (Na<sub>2</sub>SO<sub>4</sub>), and concentrated to afford 350 mg (100%) of 4: <sup>1</sup>H NMR (CDCl<sub>3</sub>) δ 0.89 (t, J = 6.65 Hz, 3H), 1.27-1.36 (m, 4H), 1.60-1.70 (m, 2H), 2.68 (t, J = 7.35 Hz, 2H), 6.76 (dd, J = 16.59 and 6.42 Hz, 1H), 6.87 (d, J = 16.17 Hz, 1H), 9.77 (t, J = 6.72 Hz, 1H); <sup>13</sup>C NMR (CDCl<sub>3</sub>) δ 13.89 (-), 22.43 (+), 23.37 (+), 31.26 (+), 41.21 (+), 137.33 (-), 144.96 (-), 193.45 (-), 200.17 (+); HRMS calcd for C<sub>9</sub>H<sub>14</sub>O<sub>2</sub> *m/z* 154.0994, found 154.0995.

**Preparation of 3,4-dioxononanal (5).** A solution of 2.5 M *n*-butyllithium in hexane (8 mL, 20 mmol) was added to a stirred solution of 1-heptyne (1.92 g, 20 mmol) and HMPA (10 mL, 57.5 mmol) in 40 mL of THF under nitrogen at -78 °C. The temperature was raised to -45 °C for 45 min, re-lowered to -78 °C, and a solution of bromoacetaldehyde diethyl acetal (3.94 g, 20 mmol) in 10 mL of THF was added dropwise. After stirring to room temperature over 20 h, the reaction mixture was concentrated, diluted into 30 mL of aqueous NH<sub>4</sub>Cl, and extracted with ether (120 mL). The organic extracts were washed with brine and water, dried (Na<sub>2</sub>SO<sub>4</sub>), and concentrated to afford a

brown residue which was purified by flash chromatography on silica gel with 1:1 EtOAc-hexane to afford 5.68 g (96%) of 1,1-diethoxy-3-nonyne as yellow oil:  $^1\text{H}$  NMR ( $\text{CDCl}_3$ )  $\delta$  0.86 (t,  $J$  = 6.87 Hz, 3H), 1.19 (t,  $J$  = 7.05 Hz, 6H), 1.26-1.38 (m, 4H), 1.39-1.50 (m, 2H), 2.12 (t,  $J$  = 6.99 Hz, 2H), 2.46 (app d,  $J$  = 5.61 Hz, 2H), 3.53 (dq,  $J$  = 8.2 and 7.1 Hz, 2H), 3.65 (dq,  $J$  = 8.2 and 7.2 Hz, 2H), 4.58 (t,  $J$  = 5.76 Hz, 1H);  $^{13}\text{C}$  NMR ( $\text{CDCl}_3$ )  $\delta$  13.89 (-), 15.17 (-), 18.70 (+), 22.18 (+), 25.02 (+), 28.60 (+), 30.99 (+), 61.62 (+), 75.14 (+), 81.80 (+), 101.32 (-); HRMS calcd for ( $\text{C}_{13}\text{H}_{24}\text{O}_2 - \text{C}_2\text{H}_5\text{O}$ )  $m/z$  167.1437, found 167.1436. Ozonized oxygen was bubbled through a solution of 2.16 g (10 mmol) of the latter alkyne in 50 mL of  $\text{CHCl}_3$  at  $-78^\circ\text{C}$  using a mechanical stirrer. When the persistence of blue color signaled complete reaction, the reaction solution was flushed with  $\text{N}_2$  for 10 min, and  $\text{Me}_2\text{S}$  (1.47 mL, 20 mmol) was added (37). After 4 h, the reaction mixture was partitioned between  $\text{CHCl}_3$  and water, the organic layer was concentrated, and the residue was purified by flash chromatography (EtOAc/hexane 1:2 v/v) to afford 2.24 g (92%) of 1,1-diethoxy-3,4-nonanedione:  $^1\text{H}$  NMR ( $\text{CDCl}_3$ )  $\delta$  0.86 (t,  $J$  = 6.75 Hz, 3H), 1.14 (t,  $J$  = 7.11 Hz, 6H), 1.24-1.32 (m, 4H), 1.50-1.59 (m, 2H), 2.68 (t,  $J$  = 7.31 Hz, 2H), 3.03 (d,  $J$  = 5.94 Hz, 2H), 3.48 (dq,  $J$  = 8.2 and 7.1 Hz, 2H), 3.61 (dq,  $J$  = 8.2 and 7.0 Hz, 2H), 4.93 (t,  $J$  = 5.79 Hz, 1H).  $^{13}\text{C}$  NMR ( $\text{CDCl}_3$ ):  $\delta$  13.80 (-), 15.10 (-), 22.22 (+), 22.60 (+), 31.26 (+), 35.83 (+), 41.27 (+), 61.78 (+), 99.16 (-), 196.81 (+), 199.82 (+). HRMS calcd for  $\text{C}_{13}\text{H}_{24}\text{O}_4$  244.1675,  $\text{C}_{11}\text{H}_{19}\text{O}_3$  ( $\text{M}^+ - \text{C}_2\text{H}_5\text{O}$ ) 199.1335, found 199.1338. The latter acetal (1.0 g) was quantitatively deprotected in 30 mL of 2N HCl/acetone (1:2 v/v) to afford **5**, which exists exclusively in its enol form in both  $\text{CHCl}_3$  and water:  $^1\text{H}$  NMR ( $\text{CDCl}_3$ )  $\delta$  0.83 (t,  $J$  = 6.78 Hz, 3H), 1.21-1.29 (m, 4H), 1.52-1.62 (m, 2H), 2.75 (t,  $J$  = 7.31 Hz, 2H), 6.18 (d,  $J$  = 3.72 Hz, 1H), 8.61 (d,  $J$  = 3.18 Hz, 1H);  $^{13}\text{C}$  NMR ( $\text{CDCl}_3$ )  $\delta$  13.89 (-), 22.41 (+), 22.87 (+), 31.27 (+), 36.92 (+), 98.63 (-), 184.28 (-), 196.70 (+), 199.79 (+); HRMS calcd for  $\text{C}_9\text{H}_{14}\text{O}_3$   $m/z$  170.0943, found 170.0939.

Supp. 6, pp. 1-7

$^{13}\text{C}$  NMR spectrum (75 MHz) of **1** in  $\text{CD}_3\text{OD}$

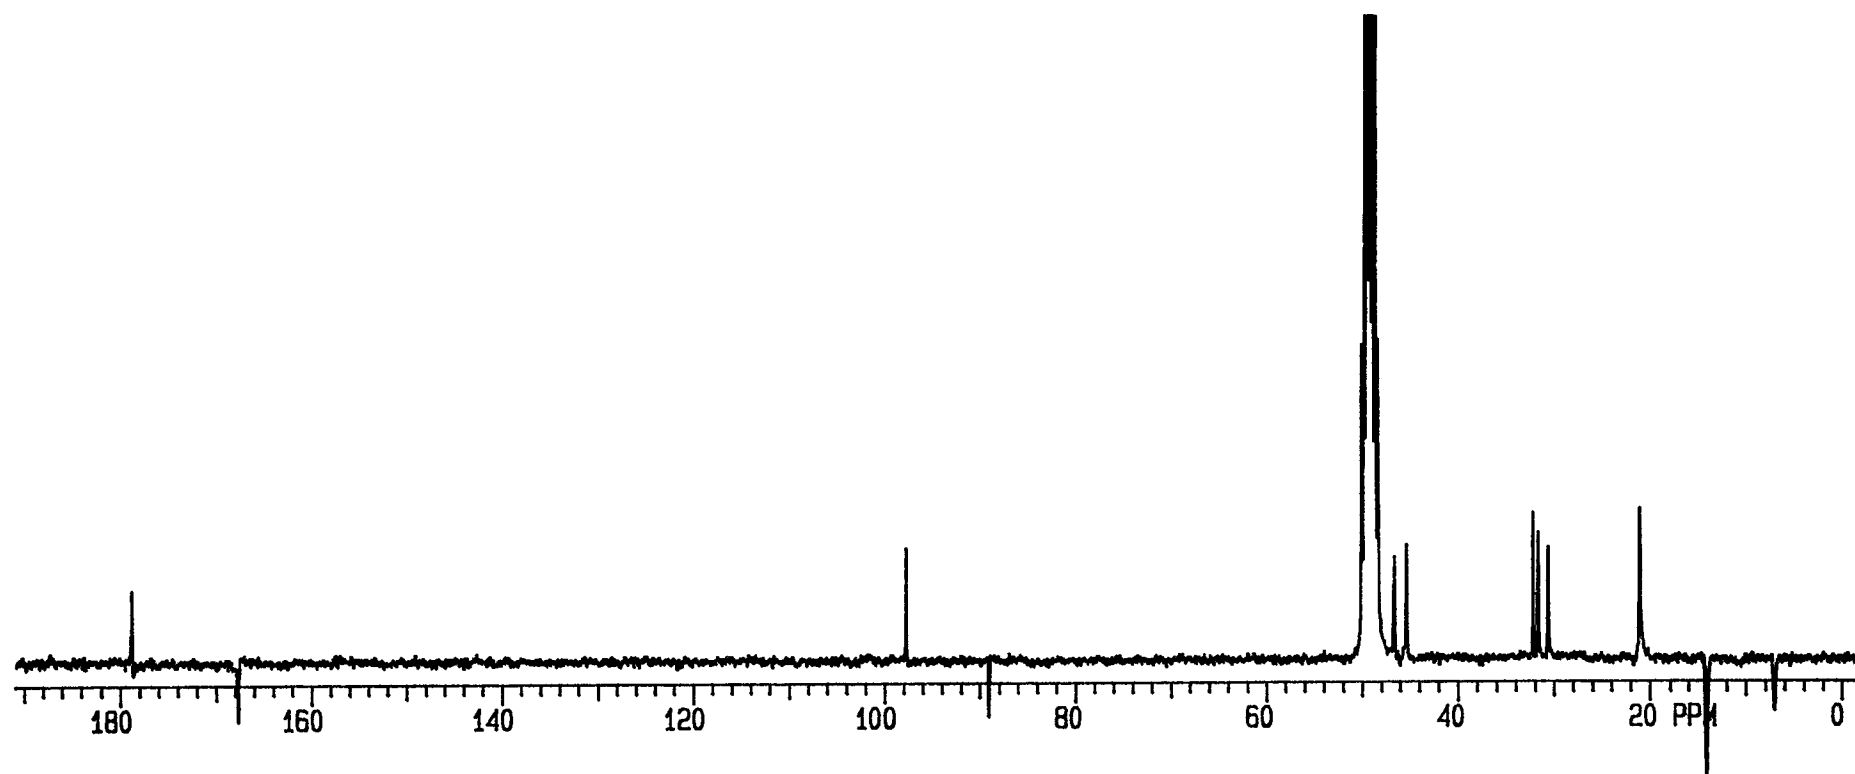

<sup>1</sup>H NMR spectrum (300 MHz) of **1** in DMSO-*d*<sub>6</sub>

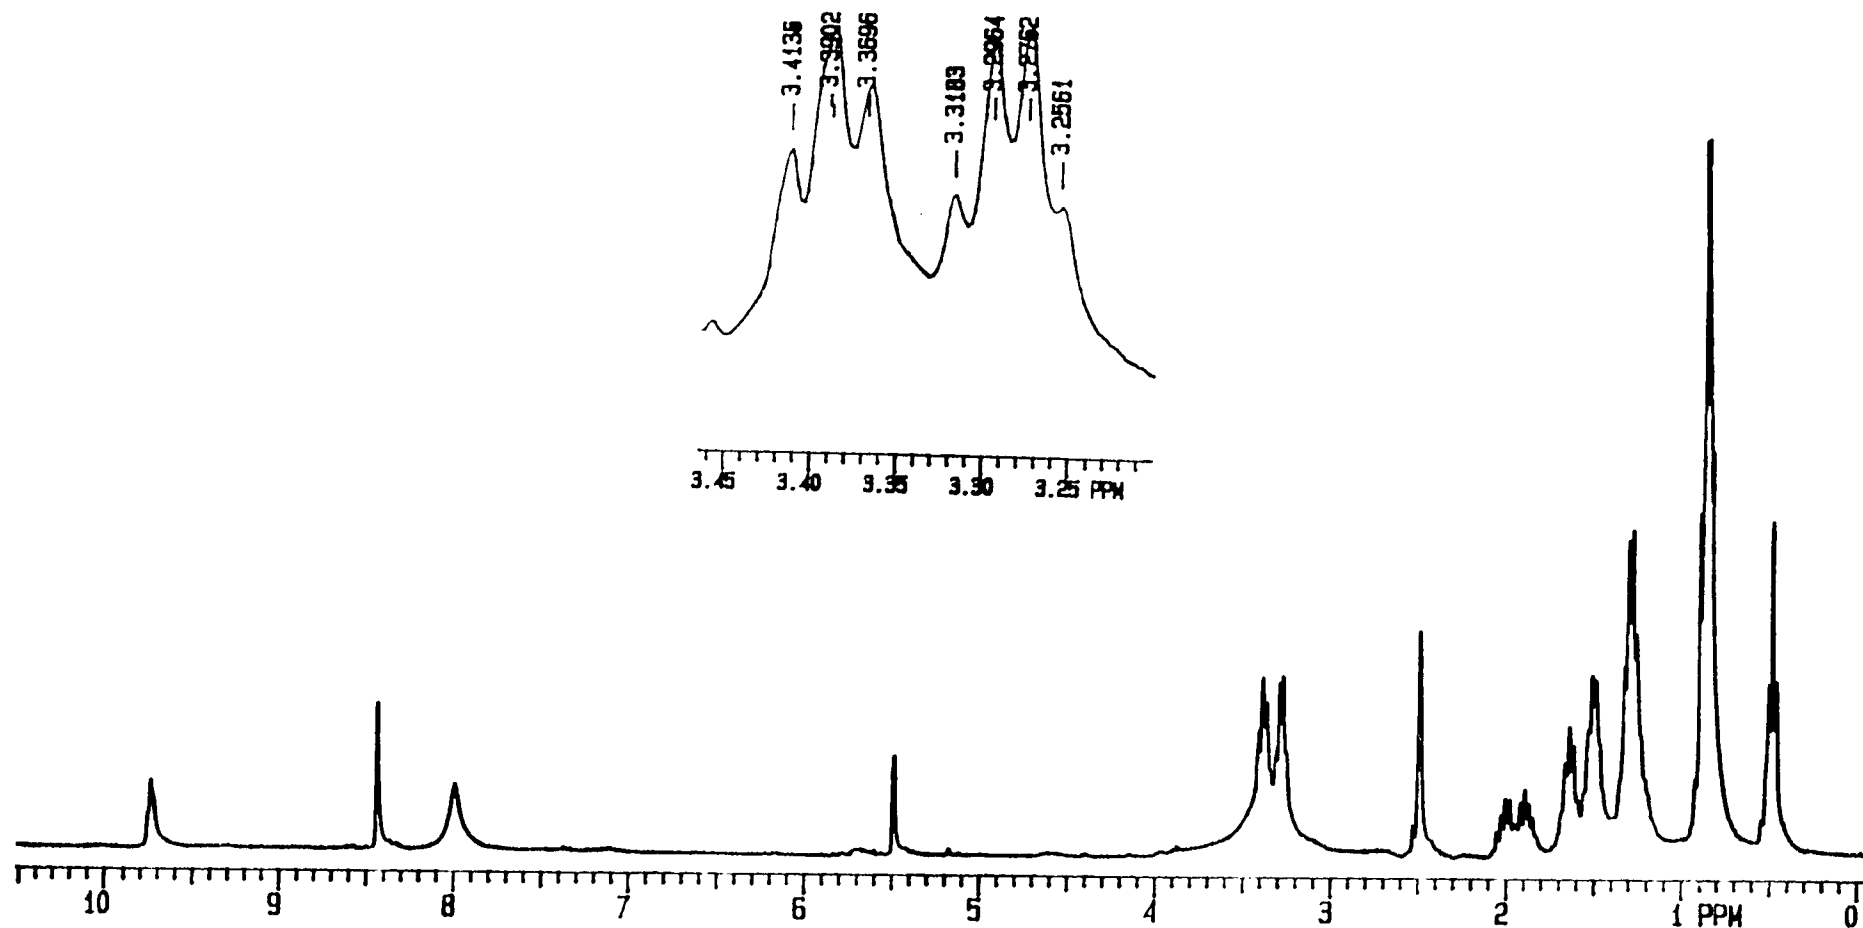

*Copy for 11/10*

$^1\text{H}$  NMR spectrum (300 MHz) of **3** in  $\text{CD}_3\text{OD}$

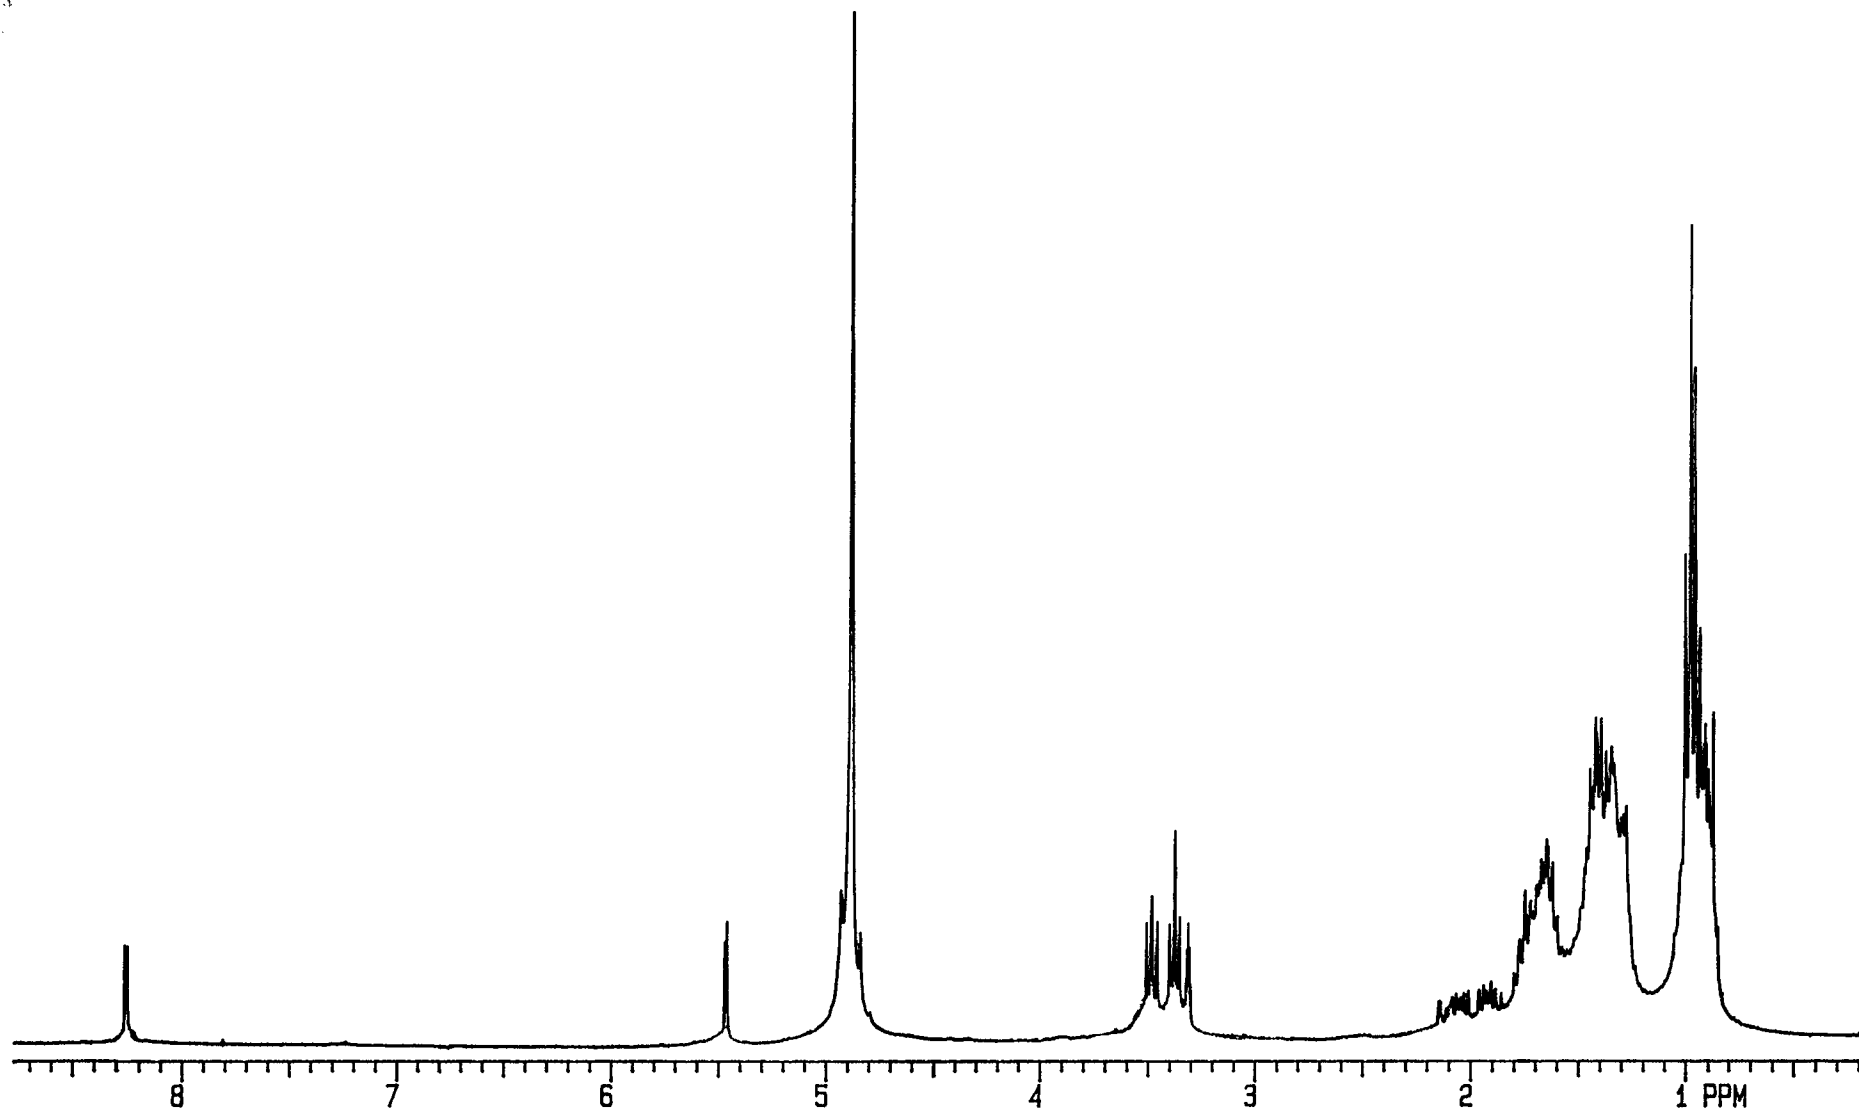

$^1\text{H}$ - $^1\text{H}$  COSY spectrum (300 MHz) of **1** in DMSO- $d_6$ 

F2 (PPM)

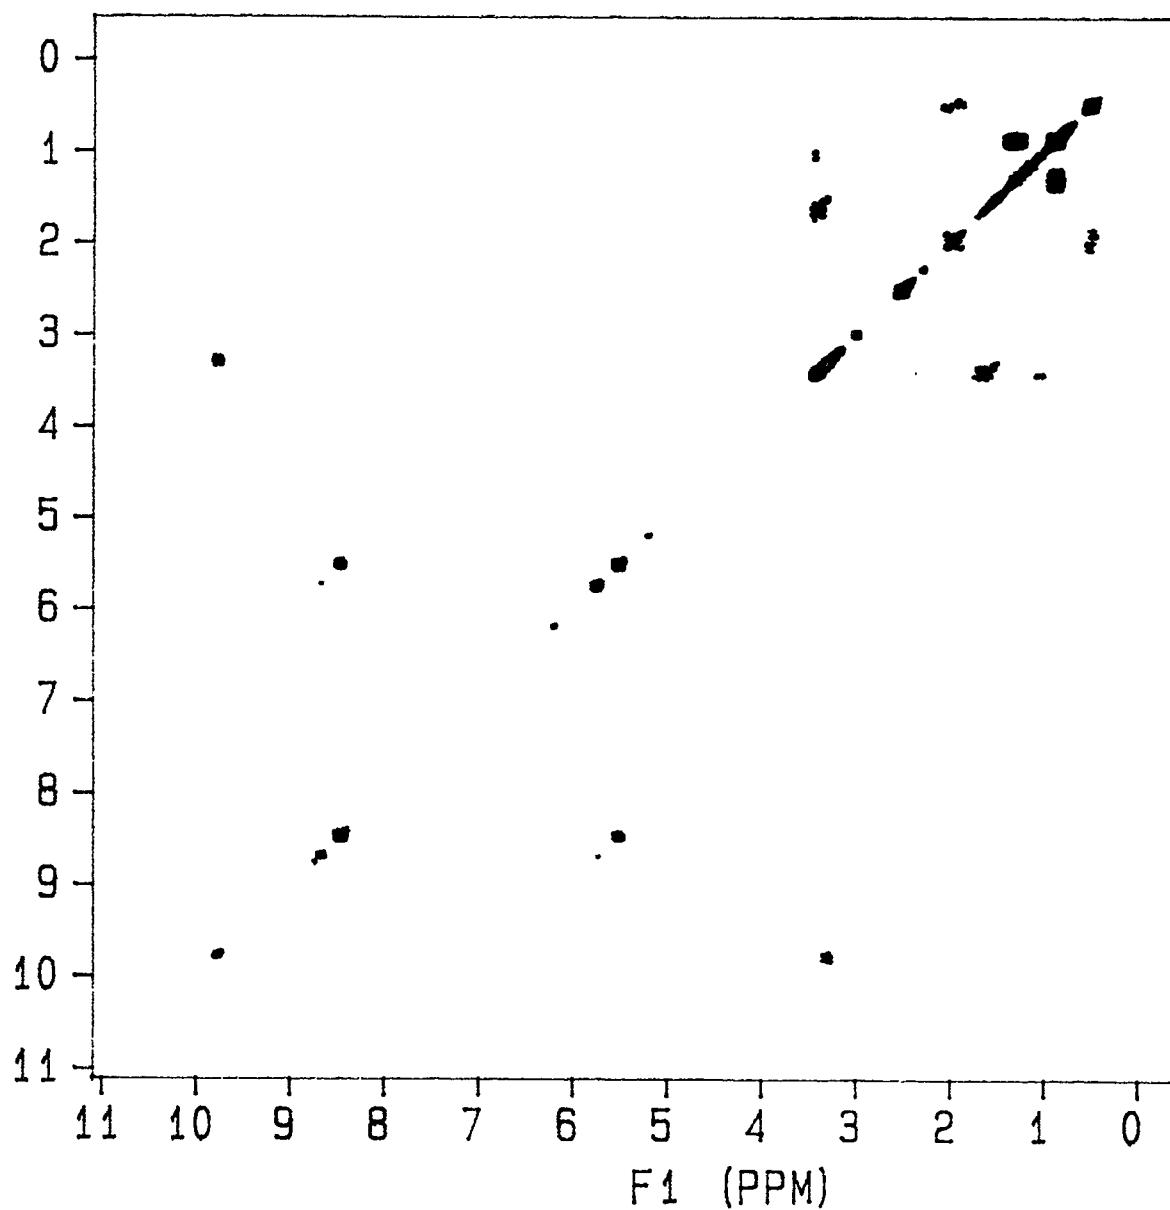

Suppl. A17

HPLC chromatogram of the reaction mixture between HHE and *n*-butylamine after 2 days. UV detection was carried out at (A) 245-295 nm and (B) 355-365 nm using a Hewlett-Packard diode array detector (HP 1050). The reaction and HPLC conditions are described in the Experimental Section. Elution of the HHE-derived fluorophore **1** is indicated.

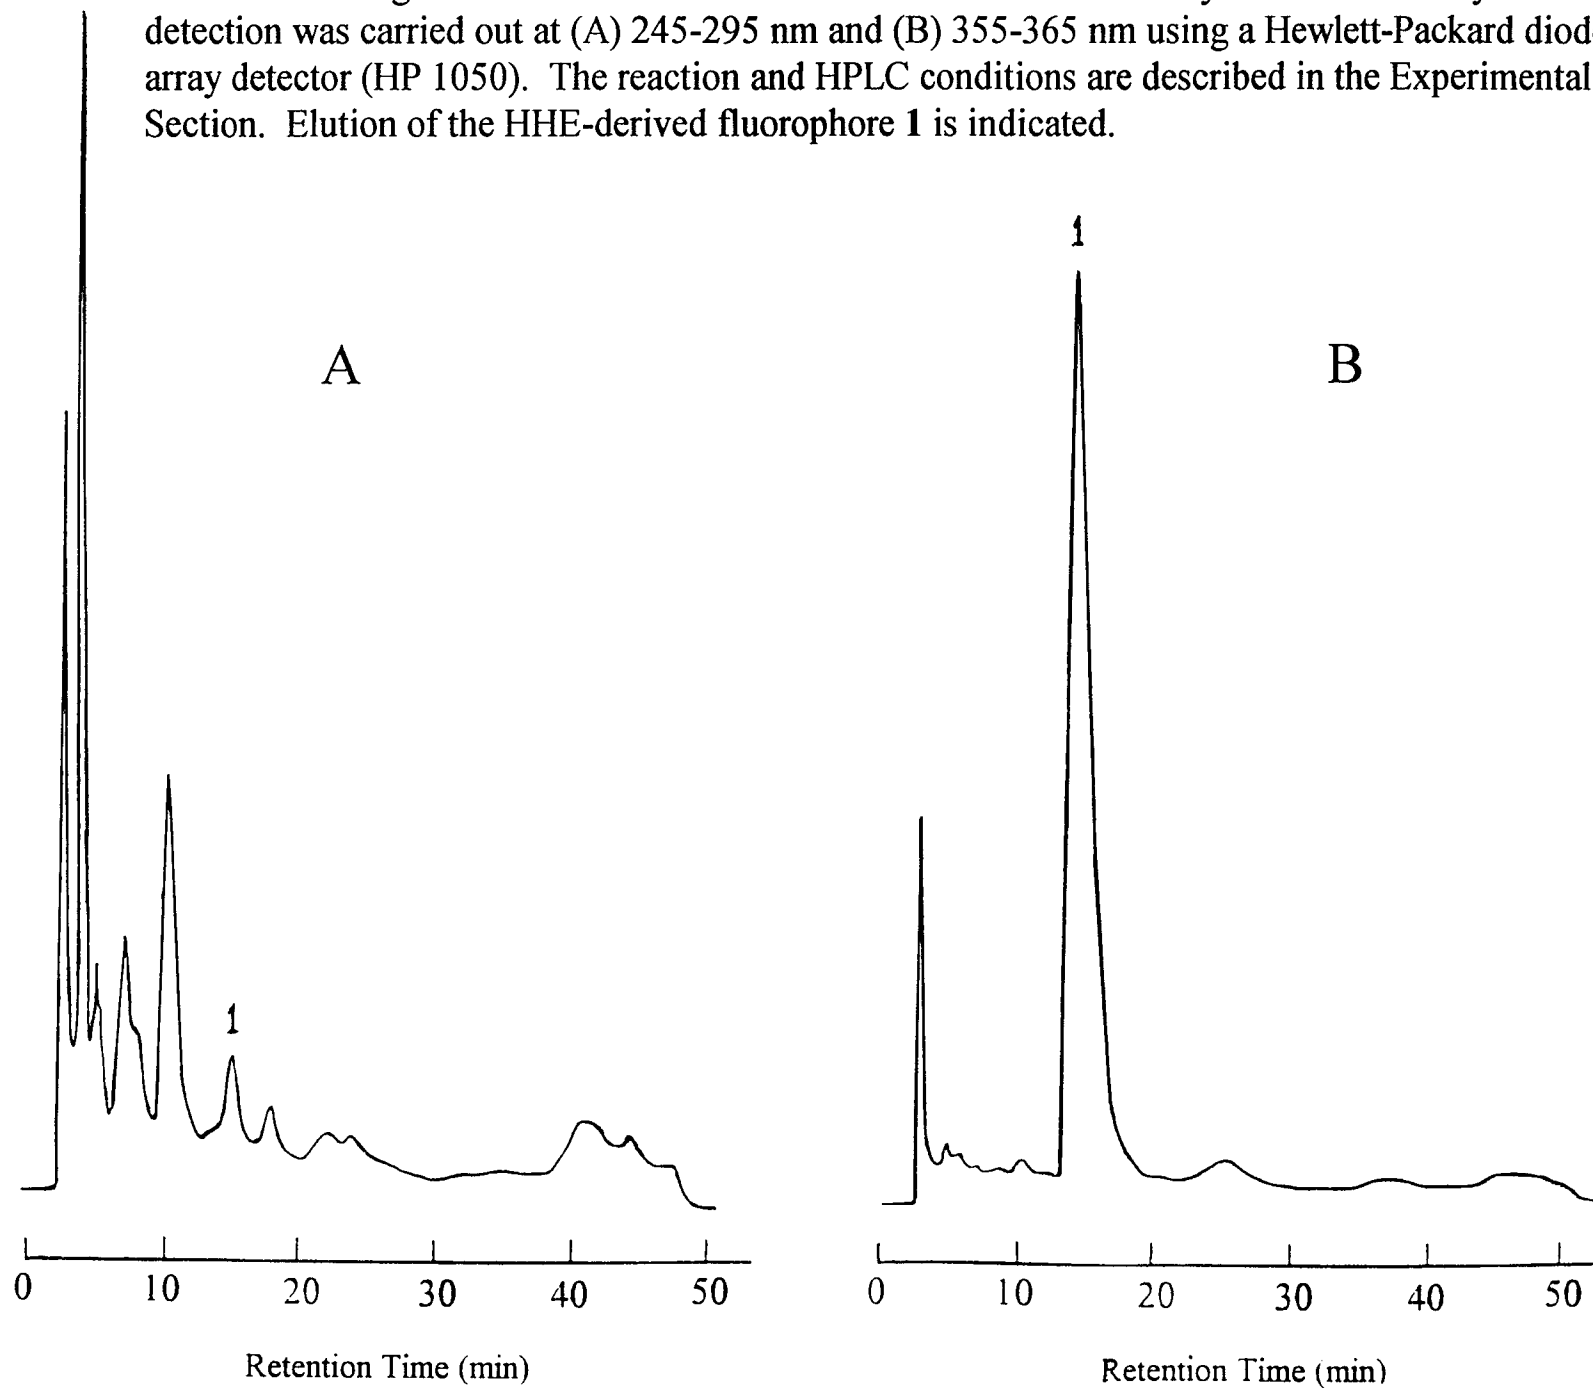

Supplement: Supplementary file 1 [file 5898882]
